# Supplementary material for: Evaluation of Pseudomonas fulva PS9.1 and Bacillus velezensis NWUMFkBS10.5 as Candidate Plant Growth Promoters during Maize-Fusarium Interaction
Source: MDPI journal article supplement (doi:10.3390/plants11030324), 2022-01-26
Supplement: s1 [file s1]

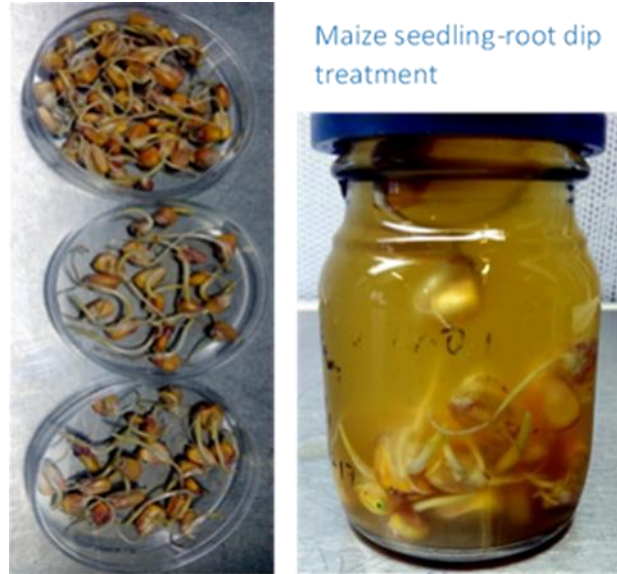

**Figure S1.** Germination of maize seedlings prior to in vitro and in vivo usage: pre-germinated seeds submerged in the 100 ml bacteria inoculum (OD 0.5:600 nm) of each treatment.

$$\% GP = NG \times 100 / TNS; \% GP = 200 \times 100/200$$
